# Supplementary material for: FDX1 expression predicts favourable prognosis in clear cell renal cell carcinoma identified by bioinformatics and tissue microarray analysis
Source: Front Genet. 2022 Sep 16;13:994741. doi: 10.3389/fgene.2022.994741 (PMC9523472; doi:10.3389/fgene.2022.994741)
Supplement: Supplementary file 3 [file Table1.XLSX]

## Sheet: Sheet1
Pathway name	Entities	Entities	Entities	Entities	Entities	Reactions	Reactions	Reactions
	found	Total	ratio	pValue	FDR	found	total	ratio	Species name
Respiratory electron transport	17	118	0.008	1.11e-16	1.61e-14	15	19	0.001	Homo sapiens
Respiratory electron transport, ATP synthesis by chemiosmotic coupling, and heat production by uncoupling proteins.	20	153	0.01	1.11e-16	1.61e-14	18	31	0.002	Homo sapiens
The citric acid (TCA) cycle and respiratory electron transport	27	238	0.016	1.11e-16	1.61e-14	30	67	0.005	Homo sapiens
Complex I biogenesis	11	59	0.004	1.4e-12	1.53e-10	9	13	0.001	Homo sapiens
Metabolism	54	3641	0.24	5.14e-08	4.47e-06	95	2268	0.163	Homo sapiens
Insulin receptor recycling	6	28	0.002	8.99e-08	6.47e-06	2	6	0	Homo sapiens
Amino acids regulate mTORC1	7	61	0.004	4.86e-07	3.01e-05	8	12	0.001	Homo sapiens
Transferrin endocytosis and recycling	6	39	0.003	6.14e-07	3.31e-05	2	11	0.001	Homo sapiens
Pyruvate metabolism and Citric Acid (TCA) cycle	8	100	0.007	1.07e-06	5.13e-05	12	36	0.003	Homo sapiens
ROS and RNS production in phagocytes	6	82	0.005	4.08e-05	0.00144	1	45	0.003	Homo sapiens
Citric acid cycle (TCA cycle)	5	50	0.003	4.27e-05	0.00144	8	17	0.001	Homo sapiens
Mitochondrial iron-sulfur cluster biogenesis	4	25	0.002	4.29e-05	0.00144	4	6	0	Homo sapiens
Iron uptake and transport	6	83	0.005	4.36e-05	0.00144	2	34	0.002	Homo sapiens
Protein localization	8	170	0.011	4.83e-05	0.0015	21	53	0.004	Homo sapiens
Cristae formation	4	31	0.002	9.8e-05	0.00276	2	2	0	Homo sapiens
Signaling by Insulin receptor	6	97	0.006	0.000102	0.00276	2	34	0.002	Homo sapiens
Mitochondrial protein import	5	69	0.005	0.000191	0.00478	9	14	0.001	Homo sapiens
Cellular response to starvation	7	176	0.012	0.0004	0.00958	8	28	0.002	Homo sapiens
Mitochondrial biogenesis	6	128	0.008	0.000447	0.00983	5	36	0.003	Homo sapiens
Glucose metabolism	6	140	0.009	0.000711	0.0149	6	50	0.004	Homo sapiens
Formation of ATP by chemiosmotic coupling	3	23	0.002	0.000743	0.0149	3	3	0	Homo sapiens
Methionine salvage pathway	3	24	0.002	0.00084	0.016	3	7	0.001	Homo sapiens
Pyrophosphate hydrolysis	2	7	0	0.00133	0.0239	2	3	0	Homo sapiens
Gluconeogenesis	4	66	0.004	0.00165	0.0296	4	26	0.002	Homo sapiens
Defective CYP11A1 causes AICSR	2	9	0.001	0.00218	0.037	1	1	0	Homo sapiens
Glyoxylate metabolism and glycine degradation	4	73	0.005	0.00237	0.0379	3	23	0.002	Homo sapiens
Nef Mediated CD4 Down-regulation	2	10	0.001	0.00267	0.0401	4	5	0	Homo sapiens
Electron transport from NADPH to Ferredoxin	2	10	0.001	0.00267	0.0401	1	2	0	Homo sapiens
Formation of apoptosome	2	13	0.001	0.00445	0.0624	8	10	0.001	Homo sapiens
Regulation of the apoptosome activity	2	13	0.001	0.00445	0.0624	4	6	0	Homo sapiens
Ion channel transport	6	209	0.014	0.0052	0.0682	1	51	0.004	Homo sapiens
Sulfur amino acid metabolism	4	92	0.006	0.00535	0.0682	4	37	0.003	Homo sapiens
Mitochondrial translation termination	4	94	0.006	0.00577	0.0682	5	5	0	Homo sapiens
Mitochondrial translation elongation	4	94	0.006	0.00577	0.0682	5	8	0.001	Homo sapiens
Cytochrome c-mediated apoptotic response	2	15	0.001	0.00587	0.0682	10	12	0.001	Homo sapiens
Regulation of gene expression by Hypoxia-inducible Factor	2	15	0.001	0.00587	0.0682	1	7	0.001	Homo sapiens
Mitochondrial translation initiation	4	96	0.006	0.0062	0.0682	3	4	0	Homo sapiens
Mitochondrial translation	4	102	0.007	0.00764	0.0833	13	17	0.001	Homo sapiens
Beta oxidation of octanoyl-CoA to hexanoyl-CoA	2	18	0.001	0.00833	0.0833	2	4	0	Homo sapiens
Beta oxidation of hexanoyl-CoA to butanoyl-CoA	2	18	0.001	0.00833	0.0833	2	4	0	Homo sapiens
